1 Identification of Genomic Insertion and Flanking Sequences of  
2 the Transgenic Drought-tolerant Maize Line “SbSNAC1-382”  
3 using the Single Molecular Real-Time (SMRT) Sequencing

4 Method

5 Tingru Zeng, Dengfeng Zhang, Yongxiang Li, Chunhui Li, Xuyang Liu, Yunsu Shi,

6 Yanchun Song, Yu Li, Tianyu Wang

7 Institute of Crop Sciences, Chinese Academy of Agricultural Sciences, Beijing, China

8 **Abstract**

9 Safety assessment of genetically modified (GM) crops is crucial in the phase of  
10 product development before the GM crops are put on the market. Characteristics of  
11 flanking sequences of exogenous insertion sequences are essential for the safety  
12 assessment and marking of transgenic crops. In this study, we used the methods of  
13 genome walking and whole genome sequencing (WGS) to identify the flanking  
14 sequence characteristics of a *SbSNAC1* transgenic drought-tolerant maize line  
15 “SbSNAC1-382”, but both of the methods failed. Then, we constructed a genomic  
16 fosmid library of the transgenic maize line, which contained  $4.18 \times 10^5$  clones with an  
17 average insertion fragment of 35 kb, covering 5.85 times of the maize genome.  
18 Subsequently, three positive clones were screened by pairs of specific primers and  
19 one of the three positive clones was sequenced by using the Single Molecule  
20 Real-Time (SMRT) sequencing technology. More than 1.95 Gb sequence data ( $\sim 10^5 \times$   
21 coverage) for the sequenced clone was generated. The junction reads mapped to the  
22 boundaries of T-DNA and the flanking sequences in the transgenic line were

23 identified by comparing all sequencing reads with the maize reference genome and  
24 the sequence of transgenic vector. Furthermore, the putative insertion loci and  
25 flanking sequences were confirmed by PCR amplification and Sanger sequencing.  
26 The results indicated that two copies of the exogenous T-DNA fragments were  
27 inserted in the same genomic site. And the exogenous T-DNA fragments were  
28 integrated at the position of Chromosome 5: 177155650 to 177155696 in the  
29 transgenic line 382. Herein, we have demonstrated the successful application of the  
30 SMRT technology for the characterization of genomic insertion and flanking  
31 sequences.

32 **Keywords: transgenic maize, flanking sequence, fosmid library, SMRT**  
33 **sequencing**

## 34 **Introduction**

35 Since genetically modified (GM) crops were first introduced in the U. S. in the  
36 mid-1990s, they have become widely adopted by growers of many countries in the  
37 world [1]. In 2017 alone, 189.8 million hectares of GM crops were planted worldwide  
38 [2]. It is an international consensus that GM crops could be commercialized after they  
39 are proven to be safe. As a result, extensive testing and comprehensive analyses of  
40 transgenic lines with excellent objective traits are necessary for biosafety assessment  
41 before being approved and entering into market. Among these, molecular  
42 characterization of GM crops at the chromosomal level including insertion sequences,  
43 sites, copy numbers and flanking sequences is essential for the safety assessment and  
44 specific detection of GM crops [3, 4]. Furthermore, identification of T-DNA flanking

45 sequences of GM crops and the development of specific detection methods are useful  
46 for breeding program, and important for bio-risk management to ensure food, feed  
47 and environmental safety [5, 6].

48 Traditionally, exogenous fragments flanking sequences of transgenic plants are  
49 obtained by various PCR-based methods according to the T-DNA sequence  
50 information [7-10]. Among them, thermal asymmetric interlaced PCR (TAIL-PCR)  
51 and genome walking are often used to isolate and clone T-DNA flanking sequences  
52 [9, 10]. Using the TAIL-PCR method by sequencing, several T-DNA flanking  
53 sequences were identified and characterized in transgenic maize [11], soybean [12],  
54 cotton [13], and alfalfa [14]. However, these PCR-based methods are laborious and  
55 expensive.

56 With the emergence and rapid development of next-generation sequencing  
57 (NGS) technology over the past few years, molecular characterization of insert  
58 locations, copy numbers, integrity, and stability of transgenic crops can be  
59 implemented in a relatively short time and at acceptable cost [15]. Up to now, a  
60 number of the flanking sequences of exogenous genes in GM plants such as  
61 *Arabidopsis* [16], rice [17], soybean [6], and maize [18] have been identified by the  
62 NGS method.

63 Taken together, both the PCR-based method and the NGS technology enabled us  
64 to successfully characterize both single and stacked transgenic events [15]. However,  
65 these approaches are difficult to identify all insertion loci and their flanking sequences  
66 of transgenic events with complex genome sequences or intricate modifications or

67 rearrangements of exogenous fragments [6, 19].

68 Maize is one of the most important crops in the world and 31% of the GM crops'  
69 growing area planted annually in the world are GM maize [1]. It is important to  
70 evaluate the safety of the GM maize, especially to identify the flanking sequence of  
71 exogenous genes in the GM maize. However, maize has larger genome and more  
72 repetitive sequences compared with soybean, cotton and rice, and it is difficult to  
73 identify flanking sequences of inserted genes [20]. In addition, transgenic maize  
74 events may often contain a part of or the entire vector backbone. In other cases, a  
75 partial copy of T-DNA inserts and the connection takes place outside the expected  
76 boundary [21, 22]. Therefore, for the acquisition of flanking sequences integrated into  
77 larger genomes and complex insertion fragments, the accurate flanking sequences can  
78 often be found by constructing DNA libraries. Turning genomes into countless  
79 fragments by physical or biological means cloned in fosmid or BAC vectors were a  
80 mainstay of genome projects during the Sanger-based sequencing era [23, 24].  
81 Compared with other libraries, fosmid libraries have the advantages of short cloned  
82 fragments (about 40 kb), single copy insertion and easier to generate [25]. Because  
83 inserts in the fosmid libraries are generated randomly by ultra-sound rather than by  
84 enzymatic digestion, inserts in the fosmid libraries can avoid potential clone biases. It  
85 is suitable for physical mapping, gene cloning and chromosome mapping of gene  
86 fragments [6, 26]. Recently emerged single-molecule based NGS technology generate  
87 longer reads (20 kb) at increased coverage depth and is particularly important in  
88 resolving the challenges in characterization of transgenic events with insert locations

89 in repetitive and low complexity regions of a genome [27]. As a result, using the  
90 fosmid libraries and the single-molecule based NGS technology might be suitable for  
91 identifying T-DNA flanking sequences of transgenic lines with complex genome  
92 sequences or intricate modifications or rearrangements of exogenous fragment.

93 Recently, we developed one transgenic line “SbSNAC1-382” by over-expression  
94 of *SbSNAC1* from sorghum, which conferred drought tolerance without a cost of crop  
95 productivity under well-watered conditions. Southern blots confirmed that the  
96 transgenic line SbSNAC1-382 was a two-copy insertion event, and the two copies  
97 might be inserted at the same genome location. In order to obtain the flanking  
98 sequence of the target gene of the transgenic maize event, after the failure of the  
99 genome walking method and the whole genome sequencing method, the single  
100 molecule real-time sequencing was used to identify the accurate flanking sequences of  
101 the inserted gene. Molecular characterization of the drought-tolerant transgenic maize  
102 at nucleic acid level will provide precise information for regulatory submissions and  
103 facilitate utilization of the line in future breeding program.

## 104 **Materials and methods**

### 105 **Plant materials**

106 *SbSNAC1* with *BstE* II and *NcoI* enzymatic restriction sites were recombined  
107 into the pCAMBIA3301 vector under control of the cauliflower mosaic virus (CaMV)  
108 35 S promoter, resulting in 35S::*SbSNAC1* constructs (S1 Fig). The constructed vector  
109 was transferred into maize hybrid HiII by *Agrobacterium*-mediated method. Positive  
110 transgenic events backcrossed with the inbred line “Zheng58” for six generations, and

111 the resulting “SbSNAC1-382” was used in subsequent flanking sequence  
112 identification.

### 113 **DNA isolation and Southern blot analysis**

114 Genomic DNA for leaf samples of the transgenic event and the non-transgenic  
115 control was isolated using the CTAB method [28].

116 Thirty micrograms of the genomic DNA from the transgenic event and the  
117 non-transgenic control were digested with the restriction enzymes of *BstEII* and *NcoI*  
118 overnight. The resolved genomic DNA was then transferred to the positively charged  
119 nylon membranes (Hybond-N<sup>+</sup>, Amersham Pharmacia Biotech) using a model 785  
120 vacuum blotter system (Bio-Rad). The *Bar* amplified fragment (Table 1) labeled by  
121 DIG high primer DNA labeling (Roche, Cat. No. 11585614910) and purified using a  
122 high pure PCR product purification kit (Roche, No. 11732668001). The DNA blots  
123 were prehybridized at 42°C for 1 h in DIG easy hyb granule and then hybridized to  
124 denatured DIG-labeled probes for 20 h. The blots were then washed twice with  
125 2×SSC and 0.1% (w/v) SDS for 15 min each and washed twice with 1×SSC and 0.  
126 1% (w/v) SDS for 15 min each. Immunological detection of the probes was carried  
127 out in accordance with the manufacturer’s instructions for the DIG high primer DNA  
128 labeling and detection starter kit II.

129 **Table 1. Primers used in this study.**

| Primer  | Sequence (5’-3’)      |
|---------|-----------------------|
| Bar F   | GAAGTCCAGCTGCCAGAAAC  |
| Bar R   | GTCTGCACCATCGTCAACC   |
| SbNACS3 | GACCGCAAGTACCCAAACGG  |
| SbNACA3 | CACCCAGTCATCCAGCCTGAG |

---

|         |                             |
|---------|-----------------------------|
| SbNACS4 | GGGACCGCAAGTACCCAAACG       |
| SbNACA4 | GCTGCGCTTCTCGCTCCTCT        |
| NosF1   | GAATCCTGTTGCCGGTCTTG        |
| NosR1   | TTATCCTAGTTTGCGCGCTA        |
| 35F1    | GCTCCTACAAATGCCATCATTGC     |
| 35R1    | GATAGTGGGATTGTGCGTCATCCC    |
| zsp1    | TATCCCTGGCTCGTCGCCGA        |
| zsp2    | AGGGCTTCAAGAGCGTGGTCGCT     |
| zsp3    | CCGTCACCGAGATTTGACTCGAGTTTC |
| YZP1    | AGAATCATAACCAGTAACAAGCC     |
| YZP2    | CAGTACATTA AAAACGTCCGCA     |
| YZP3    | ACTAAAATCCAGATCCCCCGAA      |
| YZP4    | TTCACACAAGGAAACAGCTATGA     |
| YZP5    | CGATTAAGTTGGGTAACGCCA       |
| YZP6    | CTTCGCAAGACCCTTCCTCT        |
| YZP7    | TCCCTCTCCCTCCTCATCAC        |
| YZP8    | AGATTTTCTTCTTGTCATTGGG      |
| YZP9    | CTAGAGCAGCTTGAGCTTGG        |
| V1      | GGTTTCGCTCATGTGTTGAGC       |
| G1      | AGTGCACATTGCAATCCTACAAG     |
| G2      | CCTAAGTTCATGCAACTAGAGGTTTCA |

---

## 130 **Genome walking method**

131 The 5' flanking sequence of the insertion sequence was obtained by the Genome  
132 Walking Kit according to the manufacturer instructions (TaKaRa, Dalian, China). The  
133 random primers were provided by the Genome Walking Kit and the specific primers  
134 designed based on theoretical insertion sequences (first round zsp1; second round  
135 zsp2; third round zsp3, Table 1). The specific PCR products were gel purified by  
136 using the DNA Gel Extraction Kit (Axygen, USA) and cloned to the pMD-18 vector  
137 system (Takara), and then sequenced by the Shanghai Sangon Company.

## 138 **Whole genome sequencing**

139 A total of 1.5  $\mu$ g DNA per sample was used as input material for the DNA  
140 sample preparations. Sequencing libraries were generated by using the Truseq Nano  
141 DNA HT Sample preparation Kit (Illumina USA) following manufacturer's  
142 recommendations and index codes were added to attribute sequences to each sample.  
143 Briefly, the DNA sample was fragmented by sonication to a size of 350 bp, then DNA  
144 fragments were end polished, A-tailed, and ligated with the full-length adapter for  
145 Illumina sequencing with further PCR amplification. At last, PCR products were  
146 purified (AMPure XP system) and libraries were analyzed for size distribution by  
147 Agilent2100 Bioanalyzer and quantified using real-time PCR. These libraries  
148 constructed above were sequenced by Illumina HiSeq4000 platform and 150 bp  
149 paired-end reads were generated with insert size around 350 bp.

## 150 **Construction and screening of the fosmid library**

151 DNA was interrupted by ultra-sound and separated by the method of Pulsed  
152 Field Gel Electrophoresis (PFGE). DNA fragments from 38-48 kb were recovered and  
153 end-repaired the sheared DNA to blunt and 5'-phosphorylated ends. The fosmid  
154 library was constructed with the Copy Control™ HTP Fosmid Library Production Kit  
155 (Epicenter, USA) using the pCC2FOS™ Vector and EPI300-T1<sup>R</sup> plating cells.

156 Three pairs of vector-specific primers were designed to screen positive clones  
157 from the fosmid library (SbNACS3/SbNACA3; SbNACS4/SbNACA4; Bar F/Bar R,  
158 Table 1). In the initial screening of the library, three pairs of primers were used to  
159 detect the library, and a positive colony was obtained. Colony PCR reaction contained  
160 10  $\mu$ l 2 $\times$  La Taq Mix (Takara), 1  $\mu$ l colony, 0.5  $\mu$ l forward and reverse primer, 8  $\mu$ l



161 ddH<sub>2</sub>O. The procedure of PCR was as follows: 95°C for 5 min; 95°C for 30 sec; 60°C  
162 for 30 sec; 72°C for 30 sec; and a final extension at 72°C for 5 min; 32 cycles. When  
163 a positive clone was identified, the positive colony diluted  $2 \times 10^6$  times with LB  
164 liquid media was plated on LB solid medium, and monoclones were picked and  
165 subjected to colony PCR.

## 166 **Single Molecule Real-Time Sequencing**

167 10 µg of the monoclonal plasmid was extracted and purified. The PacBio libraries  
168 were constructed using plasmid that was mechanically sheared to a size of ~22 kb,  
169 using Covaris g-TUBE (Covaris, Inc. , Woburn, MA) according the manufacturer's  
170 instructions. PacBio SMRTbell libraries were prepared by ligation of hairpin adaptors  
171 at both ends of the DNA fragment using the PacBio DNA template preparation kit 2.0  
172 for SMRT sequencing on the PacBio RS II machine (Pacific Biosciences of  
173 California, Inc., Menlo Park, CA). Bluepippin preparation system (SAGE science,  
174 Beverly, MA) was used to enrich more than 7 kb fragments in the library. Then, the  
175 quality of the library was tested by the Agilent Bioanalyzer 2100 kit (Agilent  
176 Technology, Inc. , Santa Clara, CA). Sequencing was performed on the PacBio RS II  
177 instrument as per the manufacturer's recommendations.

## 178 **Results**

### 179 **Southern blot analysis of the transgenic line**

180 In order to determine the transgene copy number, a Southern blot analysis were  
181 performed by using probes designed to hybridize the *Bar* gene in the T-DNA  
182 sequences. The results showed the transgenic line had two copies of insertion of the

183 exogenous sequences when *Hind*III and *Eco*RI were used to digest the DNA of the  
184 transgenic line (Fig 1). On the other hand, there was only one band when the DNA of  
185 the transgenic line was digested with the restriction endonucleases of *Bgl*II and *Dra*I  
186 for which there are no restriction sites in the insertion sequences (Fig 1). As a result, it  
187 might be two copies of insertion sequences at the same genomic location of the  
188 transgenic maize line.

189 **Figure 1. Southern blot analysis of the SbSNAC1-382 line.** 1 to 4 digested DNA of the  
190 transgenic line by *Hind*III, *Eco*RI, *Bgl* II and *Dra*I, respectively; 5, digested plasmids as positive  
191 controls, M, marker.

## 192 **Genome walking for detecting flanking sequences**

193 Three nested specific primers (zsp1, zsp2, zsp3) were designed according to the  
194 sequences adjacent to the T-DNA left border. According to the instructions of the  
195 Genome Walking Kit (Takara-Bio, Dalian, China), with nested specific primers and  
196 four degenerate primers, three rounds of nested PCR reaction were completed and  
197 specific band was obtained (lane 10 of Fig 2). The sequencing results demonstrated  
198 that the specific PCR fragment contained 1227 bp in length. By aligning with the  
199 maize genome sequence on Maize GDB ([www. maizegdb. org](http://www.maizegdb.org)) and the T-DNA  
200 sequence, it showed that the fragment was made up of 932 bp of non-insert DNA and  
201 295 bp of insert DNA. As expected, the 295 bp inserted DNA was identical to the  
202 sequence which was adjacent to the T-DNA left border. The 932 bp of non-insert  
203 DNA was identical to the maize genome sequence which is located between  
204 177155650 - 177156582 bp on Chromosome 5. However, the flanking sequence

205 adjacent to the T-DNA right border could not be identified with multiple nested  
206 specific primers and degenerate primers using the same method.

207 **Figure 2. Genome walking results for 5' flanking sequence.** 1-4 lanes are the first amplification  
208 results of specific primer zsp1 and degenerate primer AP1-AP4, respectively; 5-8 lanes are the  
209 second amplification results of specific primer zsp2 and degenerate primer AP1-AP4, respectively;  
210 9-12 lanes are the third amplification results of specific primer zsp3 and degenerate primer  
211 AP1-AP4, respectively; M: marker.

## 212 **WGS for detecting flanking sequences**

213 We attempted to use WGS technique to identify flanking sequences on both sides  
214 of the insertion sequence. Sequencing libraries were sequenced by Illumina  
215 HiSeq4000 platform and 150 bp paired-end reads were generated with insert size  
216 around 350 bp. After quality control processing, a total of 144.6 billion clean reads for  
217 the transgenic line were obtained (Table 2). Among them, 97.66% of the reads could  
218 be mapped to the reference genome, accounting for  $\sim 64.57 \times$  coverage of the maize  
219 genome. Furthermore, about 93.66% of the genome had at least one-fold coverage  
220 and 88.57% had at least four-fold coverage. Therefore, the above data indicate that the  
221 quality of sequencing was qualified and met the requirements of analysis.

222 In order to identify flanking sequences of putative insertion sites of exogenous  
223 fragments, all clean reads were mapped to the sequence of *pCAMBIA3301-SbSNAC1*  
224 vector and the maize reference genome. The putative flanking sequence of  
225 SbSNAC1-382 line was characterized based on junction reads in which one end of  
226 which maps to the vector sequence and the other end to the maize genome. After

227 detailed analysis, five putative flanking sequences were found. One of the five  
228 possible flanking sequences was consistent with the Genome Walking's results. The  
229 total length of the fragment was 263 bp. The 150 bp DNA sequence was identical to  
230 the sequence adjacent to the T-DNA left border, and the 113 bp DNA sequence was  
231 identical to the maize genome. Unfortunately, that the other four putative flanking  
232 sequences were not true according to the PCR results. As a result, the flanking  
233 sequence adjacent to the T-DNA right border of the SbSNAC1-382 line was still not  
234 identified by using the WGS technology.

235 **Table 2. The summary of sequence data of WGS.**

| Index                    | Value           |
|--------------------------|-----------------|
| Clean reads (bp)         | 144,595,902,900 |
| Q20 (%)                  | > 90            |
| Q30 (%)                  | > 85            |
| Mapped reads (bp)        | 932, 861, 603   |
| Total reads (bp)         | 963, 972, 686   |
| Mapping rate (%)         | 96.77           |
| Average depth (X)        | 64.57           |
| Coverage at least 1X (%) | 93.66           |
| Coverage at least 4X (%) | 88.57           |

## 236 **Fosmid library construction and positive clone screening**

237 To identify the flanking sequence adjacent to the T-DNA right border of the  
238 SbSNAC1-382 line, we constructed a fosmid library of the SbSNAC1-382 line  
239 (Takara, Dalian, China), with the recombination rate of 100% (S2 Fig). The original  
240 library was diluted and the number of colonies was counted. The library contained  
241 about  $4.18 \times 10^5$  clones, and the average length of the inserted fragments was about  
242 35 kb, which could achieve 5.85 times of the maize genome coverage. According to

243 the Clarke-Carbon formula [29], the probability of screening any gene or sequence  
244 from the constructed library was 99.71%.

245 In order to screen the target clone from the fosmid library, five pairs of primers  
246 were designed (SbNACS3/SbNACA3; SbNACS4/SbNACA4; Bar F/Bar R,  
247 NosF1/NosR1, 35F1/35R1, Table 1) according to the T-DNA sequences. According  
248 to the results of PCR methods, three positive clones were identified and stored for  
249 single-molecule real-time sequencing.

## 250 **Single-molecule real-time sequencing and Sanger sequencing**

251 One of the three positive clones screening from fosmid library was selected for  
252 sequencing. After the processing of quality control, yielding a total of 1.95 Gb in  
253 100,544 clean reads with a mean length of 9.5 Kb, an N50 length of 12.5 Kb (Table  
254 3).

255 To determine the hypothetical insertion sites of exogenous fragments, we  
256 constructed a local BLAST data library of single-molecule real-time sequencing data.  
257 According to the BLAST results of T-DNA sequences with the local data library, it  
258 confirmed the results of Southern blot that the exogenous sequences were composed  
259 of two copies of the *SbSNAC1* gene and the *bar* gene at the same maize genomic  
260 location. And the flanking sequences of both right border and left border were  
261 identified. In order to confirm the flanking sequences of the SbSNAC1-382 transgenic  
262 line, specific PCR primers were designed based on the putative genomic sequences  
263 and the insertion sequences. When using primer pairs with one primer annealing  
264 within putative flanking sequences (YZP2, YZP3, G1, G2, Table 1) and the other

265 annealing to the insertion sequence (YZP1, V1, Table 1), the gel electrophoresis  
266 revealed that PCR reactions of primer pairs (YZP1/YZP2; YZP1/YZP3; V1/G1;  
267 V1/G2, Table 1) had generated products with single band in the transgenic event 382  
268 while no correct product could be detected from the non-transgenic control of  
269 Zheng58 or negative control of water (Fig 3). In addition, YZP3/G2 (Table 1) primers  
270 were used to amplify the whole length of the inserted sequence and sanger sequencing  
271 of the PCR products showed that the sequence was basically the same as that of the  
272 single-molecule sequencing, except for a few bases. Therefore, the exogenous  
273 sequence of the SbSNAC1-382 line was integrated at the physical position of Chr. 5:  
274 177,155,650 to 177,155,696 with a 46 bp deletion (Fig 4). Furthermore, the  
275 exogenous fragment was inserted into the intergenic region of the maize genome, and  
276 no functional genes were interrupted by the inserted sequence.

277 In order to verify the results of single-molecule sequencing, we designed a series  
278 of primers on the insertion sequence (YZP2/YZP5; YZP4/YZP7; YZP6/YZP9;  
279 YZP8/G1, Table 1). The PCR products obtained by these primers were sequenced and  
280 compared with the results of single-molecule sequencing. It was found that the two  
281 sequencing results were basically the same, showing that single-molecule sequencing  
282 had a high accuracy. Further analysis of the structure of the insertion sequence  
283 revealed that the exogenous sequence contained two insertion sequences with tandem  
284 repetition and opposite direction. Because the restriction endonucleases *Hind*III and  
285 *Eco*RI are between *bar* and *SbSNAC1*, there would be two bands after digestion with  
286 these two endonucleases. Meanwhile, for the genome digested with *Dra* I and *Bgl* II

287 with no sites in the insertion sequence, there was only a single band in the Southern  
288 blot results. The special structure of the insertion sequence explained the results of  
289 Southern blot. Because of the special structure of the insertion sequence, neither the  
290 Sanger sequencing method nor the second generation sequencing method could obtain  
291 the cloned sequence.

292 **Table 3. Statistics of single-molecule real-time sequencing for plasmid DNA**

| Index                             | Value         |
|-----------------------------------|---------------|
| Polymerase read bases (bp)        | 1,949,620,057 |
| Number of polymerase reads        | 100,544       |
| Post-filter mean read length (bp) | 19,390        |
| Polymerase read N50 (bp)          | 28,065        |
| Polymerase read quality           | 0.83          |
| Mean subread length (bp)          | 9,509         |
| Subreads N50 (bp)                 | 12,507        |
| Number of subreads                | 204,500       |

293 **Fig 3. PCR validation of transgenic insertion sites.** (A) PCR verification of 5' end of inserted  
294 sequence. 1, 2, 3 and 4, 5, 6 primer YZP1/YZP2 and YZP1/YZP3 amplified in the transgenic line,  
295 negative control Zheng58, negative control of water, respectively. M: marker. (B) PCR  
296 verification of 3' end of inserted sequence. 1, 2, 3 and 4, 5, 6 primer V1/G1 and V1/G2 amplified  
297 in the transgenic line, negative control Zheng58, negative control of water, respectively.

298 **Fig 4. Schematic diagram of insertion loci and flanking sequences of SbsNAC1-382.** The  
299 numbers under the line of Chr. 5 indicates physical positions on the chromosome. The arrows  
300 indicate the position of the validation primer.

## 301 Discussion

302 Detailed molecular characteristics of flanking sequences of insertions play an  
303 important role in safety assessment of genetically modified crops [30]. Traditionally,  
304 the PCR-based methods such as Tail-PCR and genome walking were used to  
305 determine locations of integration sites and junction sequences between exogenous  
306 sequences and host genome [9, 31]. With the continuous improvement of technology,  
307 the flanking sequence of single T-DNA copy insertion transgenic lines can be

308 obtained quickly and cheaply by these PCR-based methods. Charles et al. amplified  
309 the 5' flanking sequence of insertion sequence of 75 *Mu* maize mutant lines based on  
310 the PCR method, but the flanking sequences of 20% of the lines could not be obtained  
311 by this method in their study [32]. These PCR-based methods may not work well if  
312 the deletion, modification or rearrangement occurred in exogenous insertion  
313 sequences. On the other hand, high level of duplication or repetitive genome  
314 sequences adjacent to the exogenous fragment insertion location might increase the  
315 difficulty of identifying the flanking sequences. The maize genome size is about  
316 2.3-2.5 G and nearly 85% of the maize genome is composed of hundreds of families  
317 of transposable elements, dispersed unevenly across the whole genome [33, 34]. In  
318 our research, the genome walking method was also used to amplify the flanking  
319 sequence of the insertion sequences, but only one end of the flanking sequence was  
320 identified due to the complex structure of the insertion sequences. As a result, using  
321 the PCR-based methods to identify the flanking sequences of complex exogenous  
322 fragments of transgenic lines might be a challenge in the maize genome.

323         With the emergence and development of high throughput next generation  
324 sequencing (NGS) technology, the cost of whole genome sequencing has been greatly  
325 reduced (Table 4). The NGS technology has been widely used in different species to  
326 discover genome structural variation, rearrangement, and so on [35-37], with some  
327 advantages including high throughput, no need for large amounts of DNA, time and  
328 labor saving [38]. Compared with other methods, the WGS combined with targeted  
329 bioinformatics analysis has become a sensitive and efficient method for identifying



330 molecular characteristics of GM crops. Guo et al. used the WGS technology to  
331 sequence and analyze the sequence information of two GM soybean events, and  
332 successfully identified from one single read analysis [6]. In the work of Kiran et al.,  
333 by using the NGS method together with the PCR amplification to identify the T-DNA  
334 insertion site and flanking sequence of the GM maize IE09S034 at the 3' end [18].  
335 Although several NGS-based methods have been developed to identify the molecular  
336 characteristics of genetically modified crops, some examples often fail to identify  
337 insertion sites and flanking sequenced in GM crops. Park et al. used the WGS  
338 technology to identify the flanking sequences of three GM rice materials, but one  
339 failed to identify the flanking sequences of GM rice [39]. The authors of this article  
340 points out that if they can get a longer reads, this problem may not arise. The same  
341 problem has arisen in the course of our research. We used the WGS method to  
342 sequence the transgenic maize lines. After detailed analysis, only the one end flanking  
343 sequence of the insertion fragments was identified. Generally, the NGS technology  
344 using to identify the flanking sequences might be efficient if the transgenic line has  
345 one or two copies of insertion or stacked transgenic events. On the other hand, the  
346 clean reads of the WGS technology are usually only about 150 bp, and assembling the  
347 flanking sequences requires a large number of reads in the insertion region to be  
348 spliced together, which is a huge challenge for the genome with a large number of  
349 repetitive sequences. In our study,  $\sim 64.57 \times$  coverage of the maize genome were  
350 sequenced, and only one end flanking sequence was identified. The insertion  
351 sequence consisted of two copies of T-DNA sequences, and it had no further clear

352 sequence information, which increased the difficulty of identifying the flanking  
353 sequence using the WGS technology. Increasing the sequence coverage by deep  
354 sequencing might be helpful to identify the other end flanking sequence. But it is still  
355 difficulty to characterize the structure of the exogenous sequences using the WGS  
356 technology.

357 The fosmid technology has been applied in genomics of many species, such as  
358 rice [40], maize [41], and human [42]. Compared with the BAC library, the  
359 construction of fosmid library is simpler and faster. Furthermore, average length of  
360 the insertion sequences of the fosmid library is 38-48 kb which might be suitable to  
361 identify the flanking sequences and characterize the structure of the insertion  
362 sequence of transgenic lines. On the other hand, read length of single-molecule  
363 real-time DNA sequencing might be 10-20 kb, which may also contribute to  
364 characterize the insertion sequence of transgenic events. In our study, three positive  
365 clones were accurately identified from the fosmid library using the PCR method with  
366 three pairs of specific primers. Furthermore, with the SMRT sequencing technology,  
367 the flanking sequences were identified and the structure of exogenous insertion  
368 sequences was characterized. Although the use of the method of building fosmid  
369 libraries and the third generation sequencing to obtain flanking sequences of GM  
370 crops is more time-consuming and costly than the method based on PCR and WGS, it  
371 is more reliable for some GM crops with complex genomic or insertion sequence  
372 structure. In identifying the flanking sequences of GM crops, the method of  
373 constructing fosmid libraries combined with the third-generation sequencing

374 technology is not a high-throughput method, it is more time-consuming and costly,  
375 but it is more reliable to effectively identify the flanking sequences and characterize  
376 the insertion sequences with deletion, modification or rearrangement. As a result,  
377 when identifying the flanking sequences of genetically modified crops, different  
378 methods should be flexibly selected according to their genomic characteristics and the  
379 internal structure of insertion sequences (Table 4).

380 **Table 4. Characteristic comparison of three methods for obtaining flanking sequences.**

| Method            | Time  | Cost      | Insertion sequence structure | Genome complexity | Flux level |
|-------------------|-------|-----------|------------------------------|-------------------|------------|
| PCR-based         | Short | Cheap     | Simple                       | Simple            | Low        |
| NGS               | Short | Cheap     | Simple                       | Simple            | High       |
| Fosmid+sequencing | Long  | Expensive | Complex                      | Complex           | Low        |

## 381 **Supporting Information**

382 **S1 Figure. Vector for transgenic line.**

383 **S2 Figure. Electrophoretogram of fosmid clones digested with *Not I*.** 1-16: Insert  
384 fragments; M: marker.

## 385 **Acknowledgments**

386 This work was carried out with the support of Innovation Program of Chinese  
387 Academy of Agricultural Sciences and the Major Projects of Genetically Modified  
388 Organisms, China (2016ZX08003004).

## 389 **References**

- 390 1. Graham B and Peter B. Environmental impacts of genetically modified (GM) crop use 1996–  
391 2015: Impacts on pesticide use and carbon emissions. *GM Crops Food*. 2017; 8:2, 117-147. [doi:](https://doi.org/10.1080/21645698.2017.1309490)  
392 [org/10.1080/21645698.2017.1309490](https://doi.org/10.1080/21645698.2017.1309490) PMID: 28414252
- 393 2. ISAAA. Global Status of Commercialized Biotech/GM Crops in 2017: Biotech Crop  
394 Adoption Surges as Economic Benefits Accumulate in 22 Years. 2017; Vol. 53.

- 395 3. Codex Alimentarius Commission. Guideline for the conduct of food safety assessment of  
396 foods derived from recombinant-DNA plants. CAC/GL. 2003; 45, 1–18.
- 397 4. European Food Safety Authority. Guidance on the environmental risk assessment of  
398 genetically modified plants. European Food Safety Authority. 2010; 8:1879.
- 399 5. Fraiture M, Herman P, Lefevre LT, Loose MD, Deforce D, Roosens NH. Integrated DNA  
400 walking system to characterize abroad spectrum of GMOs in food/feed matrices. BMC Biotechnol.  
401 2015; 15:76, 1-11. [doi: org/10.1186/s12896-015-0191-3](https://doi.org/10.1186/s12896-015-0191-3) PMID: 26272331
- 402 6. Guo B, Guo Y, Hong H, Qiu LJ. Identification of genomic insertion and flanking sequence of  
403 G2-EPSPS and GAT transgenes in soybean using whole genome sequencing method. Front Plant  
404 Sci. 2016; Jul 12;7:1009. [doi: org/10.3389/fpls.2016.01009](https://doi.org/10.3389/fpls.2016.01009) PMID: 27462336
- 405 7. Triglia T, Peterson MG, Kemp DJ. A procedure for *in vitro* amplification of DNA segments  
406 that lie outside the boundaries of known sequences. Nucleic Acids Res. 1988; Aug 25;  
407 16(16):8186. [doi: org/10.1093/nar/16.16.8186](https://doi.org/10.1093/nar/16.16.8186) PMID: 3047679
- 408 8. Jones DH, Winistorfer S C. Sequence specific generation of a DNA panhandle permits PCR  
409 amplification of unknown flanking DNA. Nucleic Acids Res. 1992; Feb11; 20(3): 595-600. [doi:](https://doi.org/10.1093/nar/20.3.595)  
410 [org/10.1093/nar/20.3.595](https://doi.org/10.1093/nar/20.3.595) PMID: 1371352
- 411 9. Liu YG, Mitsukawa N, Oosumi T, Whittier RF. Efficient isolation and mapping of  
412 *Arabidopsis thaliana* T-DNA insert junctions by thermal asymmetric interlaced PCR. Plant J.  
413 1995; 8: 457-463.
- 414 10. Ji J, Braam J. Restriction site extension PCR: A novel method for high-throughput  
415 characterization of tagged DNA fragments and genome walking. PLoS ONE. 2010; May 11; 5(5):  
416 e10577. [doi: org/10.1371/journal.pone.0010577](https://doi.org/10.1371/journal.pone.0010577) PMID: 20485508

- 417 11. Yang L, Xu S, Pan A, Yin C, Zhang K, Wang Z, et al. Event specific qualitative and  
418 quantitative polymerase chain reaction detection of genetically modified MON863 maize based on  
419 the 5'-transgene integration sequence. *J Agric Food Chem*. 2005 Nov 30; 53(24): 9312-8. [doi:](#)  
420 [org/10.1021/jf051782o](https://doi.org/10.1021/jf051782o) PMID: 16302741
- 421 12. Wang XB, Jiang LX, Wei L, Liu L, Lu W, Li WX. Integration and insertion site of EPSPs  
422 gene on the soybean genome in genetically modified glyphosate-resistant soybean. *Acta Agron*  
423 *Sin*. 2010; 36, 365–375. [doi: org/10.3724/SP.J.1006.2010.00365](#)
- 424 13. Akritidis P, Pasentsis K, Tsaftaris AS, Mylona PV, Polidoros AN. Identification of unknown  
425 genetically modified material admixed in conventional cotton seed and development of an  
426 event-specific detection method. *Electron J Biotechn*. 2008; 11, 7683. [doi:](#)  
427 [org/10.2225/vol11-issue2-fulltext-11](https://doi.org/10.2225/vol11-issue2-fulltext-11)
- 428 14. Sun L, Gill US, Nandety RS, Kwon S, Mehta P, Dickstein R, et al. Genome-wide analysis of  
429 flanking sequences reveals that *Tnt1* insertion is positively correlated with gene methylation in  
430 *Medicago truncatula*. *Plant J*. 2019; Jun; 98(6): 1106-1119. [doi: org/10.1111/tpj.14291](#) PMID:  
431 30776165
- 432 15. Guttikonda SK, Marri P, Mammadov J, Ye L, Soe K, Richey K, et al. Molecular  
433 characterization of transgenic events using next generation sequencing approach. *PLoS ONE*.  
434 2016; Feb 23; 11(2): e0149515. [doi: org/10.1371/journal.pone.0149515](#) PMID: 26908260
- 435 16. Inagaki S, Henry IM, Lieberman MC, Comai L. High-throughput analysis of T-DNA  
436 location and structure using sequence capture. *PLoS ONE*. 2015; Oct 7; 10(10): e0139672 [doi:](#)  
437 [org/10.1371/journal.pone.0139672](https://doi.org/10.1371/journal.pone.0139672) PMID: 26445462
- 438 17. Park D, Kim DG, Jang G, Lim JS, Shin YJ, Kin J, et al. Efficiency to discovery transgenic

- 439 loci in GM rice using next generation sequencing whole genome re-sequencing. *Genomics Inform.*  
440 2015; Sep; 13(3): 81-5. [doi: org/0.5808/GI.2015.13.3.81](https://doi.org/10.5808/GI.2015.13.3.81) PMID: 26523132
- 441 18. Siddique K, Wei J, Li R, Zhang D, Shi J. Identification of T-DNA insertion site and flanking  
442 sequence of a genetically modified maize event IE09S034 using Next-generation sequencing  
443 technology. *Mol Biotechnol.* 2019; Sep; 61(9): 694-702. [doi: org/10.1007/s12033-019-00196-0](https://doi.org/10.1007/s12033-019-00196-0)  
444 PMID: 31256331
- 445 19. Daniela W, Leif S, Joachim B, Lutz G. Next-generation sequencing as a tool for detailed  
446 molecular characterization of genomic insertions and flanking regions in genetically modified  
447 plants: a pilot study using a rice event unauthorized in the EU. *Food Anal Method.* 2013; 6, 1718.  
448 [doi: org/10.1007/s12161-013-9673-x](https://doi.org/10.1007/s12161-013-9673-x)
- 449 20. Wei F, Coe E, Nelson W, Bharti AK, Engler F, Butler E, et al. Physical and genetic structure  
450 of the maize genome reflects its complex evolutionary history. *PLoS Genet.* 2007; Jul; 3(7): e123.  
451 [doi: org/10.1371/journal.pgen.0030123](https://doi.org/10.1371/journal.pgen.0030123) PMID: 17658954
- 452 21. Oltmanns H, Frame B, Lee LY, Johnson S, Li B, Wang K, et al. Generation of  
453 backbone-free, low transgene copy plants by launching T-DNA from the *Agrobacterium*  
454 chromosome. *Plant Physiol.* 2010; Mar; 152(3): 1158-66. [doi: org/10.1104/pp.109.148585](https://doi.org/10.1104/pp.109.148585) PMID:  
455 20023148
- 456 22. Sylvie DB, Chris DW, Marc VM, Ann D. T-DNA vector backbone sequences are frequently  
457 integrated into the genome of transgenic plants obtained by *Agrobacterium*-mediated  
458 transformation. *Mol Breeding.* 2000; 6: 459–468. [doi: org/10.1023/A:102657552](https://doi.org/10.1023/A:102657552)
- 459 23. Kim UJ, Shizuya H, de Jong PJ, Birren B, Simon MI. Stable propagation of cosmid sized  
460 human DNA inserts in an F factor based vector. *Nucleic Acids Res.* 1992; Mar 11; 20(5): 1083-5.

- 461 [doi: org/10.1093/nar/20.5.1083](https://doi.org/10.1093/nar/20.5.1083) PMID: 1549470
- 462 24. Shizuya H, Birren B, Kim UJ, Mancino V, Slepak T, Tachiiri Y, et al. Cloning and stable  
463 maintenance of 300-kilobase-pair fragments of human DNA in *Escherichia coli* using an  
464 F-factor-based vector. Proc Natl AcadSci U S A. 1992; Sep 15; 89(18): 8794-7. [doi:](https://doi.org/10.1073/pnas.89.18.8794)  
465 [org/10.1073/pnas.89.18.8794](https://doi.org/10.1073/pnas.89.18.8794) PMID: 1528894
- 466 25. Kidd JM, Cooper GM, Donahue WF, Hayden HS, Sampas N, Graves T, et al. Mapping and  
467 sequencing of structural variation from eight human genomes. Nature. 2008; May 1; 453(7191):  
468 56-64. [doi: org/10.1038/nature06862](https://doi.org/10.1038/nature06862) PMID: 18451855
- 469 26. Tuzun E, Sharp AJ, Bailey JA, Kaul R, Morrison VA, Pertz LM, et al. Fine-scale  
470 structural variation of the human genome. Nat Genet. 2005; Jul;37(7):727-32. [doi:](https://doi.org/10.1038/ng1562)  
471 [org/10.1038/ng1562](https://doi.org/10.1038/ng1562) PMID: 15895083
- 472 27. Eid J, Fehr A, Gray J, Luong K, Lyle J, Otto G, et al. Real-time DNA sequencing from  
473 single polymerase molecules. Science. 2009; Jan 2; 323(5910): 133-8. [doi:](https://doi.org/10.1126/science.1162986)  
474 [org/10.1126/science.1162986](https://doi.org/10.1126/science.1162986) PMID: 19023044
- 475 28. Saghai-Maroo MA, Soliman KM, Jorgensen RA, Allard RW. Ribosomal DNA  
476 spacer-length polymorphisms in barley: mendelian inheritance, chromosomal location, and  
477 population dynamics. Proc Natl AcadSci U S A. 1984; Dec; 81(24): 8014-8. [doi:](https://doi.org/10.1073/pnas.81.24.8014)  
478 [org/10.1073/pnas.81.24.8014](https://doi.org/10.1073/pnas.81.24.8014) PMID: 6096873
- 479 29. Clarke L, Carbon J. A colony bank containing synthetic CoI EI hybrid plasmids  
480 representative of the entire *E. coli* genome. Cell. 1976; 9(1): 91-99.
- 481 30. Yang L, Wang C, Holst-Jensen A, Morisset D, Lin Y, Zhang D. Characterization of GM  
482 events by insert knowledge adapted re-sequencing approaches. Sci Rep. 2013; Oct 3; 3: 2839.

483 [doi: org/10.1038/srep02839](https://doi.org/10.1038/srep02839) PMID: 24088728

484 31. Nakayama T, Soma M, Rahmutula D, Ozawa Y, Kanmatsuse K. Isolation of the 5'-flanking  
485 region of genes by thermal asymmetric interlaced polymerase chain reaction. *Med SciMonit.* 2001;  
486 7(3): 345~349. PMID: 11386007

487 32. Dietrich CR, Cui F, Packila ML, Li J, Ashlock DA, Nikolau BJ, et al. Maize *Mu* transposons  
488 are targeted to the 5'-untranslated region of the *g18* gene and sequences flanking *Mu* target-site  
489 duplications exhibit nonrandom nucleotide composition throughout the genome. *Genetics.* 2002;  
490 Feb; 160(2): 697-716. PMID: 11861572

491 33. Schnable PS, Ware D, Fulton RS, Stein JC, Wei F, Pasternak S, et al. The B73 maize  
492 genome: Complexity, diversity, and dynamics. *Science.* 2009; Nov 20; 326(5956): 1112-5. [doi:](https://doi.org/10.1126/science.1178534)  
493 [org/10.1126/science.1178534](https://doi.org/10.1126/science.1178534) PMID: 19965430

494 34. Hirsch CN, Hirsch CD, Brohammer AB, Bowman MJ, Soifer I, Barad O, et al. Draft  
495 assembly of elite inbred line PH207 provides insights into genomic and transcriptome diversity in  
496 maize. *Plant Cell.* 2016; Nov; 28(11): 2700-2714. [doi: org/10.1105/tpc.16.00353](https://doi.org/10.1105/tpc.16.00353) PMID:  
497 27803309

498 35. Campbell PJ, Stephens PJ, Pleasance ED, O'Meara S, Li H, Santarius T, et al. Identification  
499 of somatically acquired rearrangements in cancer using genome-wide massively parallel  
500 paired-end sequencing. *Nat Genet.* 2008; Jun; 40(6): 722-9. [doi: org/10.1038/ng.128](https://doi.org/10.1038/ng.128) PMID:  
501 18438408

502 36. Hormozdiari F, Hajirasouliha I, McPherson A, Eichler EE, Sahinalp SC. Simultaneous  
503 structural variation discovery among multiple paired-end sequenced genomes. *Genome Res.*  
504 2011; Dec; 21(12): 2203-12. [doi: org/10.1101/gr.120501.111](https://doi.org/10.1101/gr.120501.111) PMID: 22048523



- 505 37. Dubose AJ, Lichtenstein ST, Narisu N, Bonnycastle LL, Swift AJ, Chines PS, et al. Use of  
506 microarray hybrid capture and next-generation sequencing to identify the anatomy of a transgene.  
507 Nucleic Acids Res. 2013; Apr 1; 41(6): e70. [doi: org/10.1093/nar/gks1463](https://doi.org/10.1093/nar/gks1463) PMID: 23314155
- 508 38. Pauwels K, De Keersmaecker SC, De Schrijver A, Jardin PD, Roosens NH, Herman P .  
509 Next-generation sequencing as a tool for the molecular characterization and risk assessment of  
510 genetically modified plants: add value or not. Trends Food Sci Tech. 2015; 45, 319–326. [doi:](https://doi.org/10.1016/j.tifs.2015.07.009)  
511 [org/10.1016/j.tifs.2015.07.009](https://doi.org/10.1016/j.tifs.2015.07.009)
- 512 39. Park D, Park SH, Ban YW, Kim YS, Park KC, Kim NS, et al. A bioinformatics approach for  
513 identifying transgene insertion sites using whole genome sequencing data. BMC Biotechnol. 2017;  
514 Aug 15; 17(1): 67. [doi: org/10.1186/s12896-017-0386-x](https://doi.org/10.1186/s12896-017-0386-x) PMID: 28810845
- 515 40. Ammiraju JS, Yu Y, Luo M, Kudrna D, Kim H, Goicoechea JL, et al. Random sheared  
516 fosmid library as a new genomic tool to accelerate complete finishing of rice (*Oryza sativa* spp.  
517 Nipponbare) genome sequence: sequencing of gap-specific fosmid clones uncovers new  
518 euchromatic portions of the genome. Theor Appl Genet. 2005; Nov; 111(8): 1596-607. [doi:](https://doi.org/10.1007/s00122-005-0091-3)  
519 [org/10.1007/s00122-005-0091-3](https://doi.org/10.1007/s00122-005-0091-3) PMID: 16200416
- 520 41. Liu CX, Liu XL, Lei L, Guan HY, Cai YL. Fosmid library construction and screening for the  
521 maize mutant gene *Vestigial glume 1*. The Crop Journal. 2016; 4(1): 55-60. [doi:](https://doi.org/CNKI:SUN:CROP.0.2016-01-007)  
522 [org/CNKI:SUN:CROP.0.2016-01-007](https://doi.org/CNKI:SUN:CROP.0.2016-01-007)
- 523 42. International Human Genome Sequencing Consortium. Finishing the euchromatic sequence  
524 of the human genome. Nature. 2004; Oct 21; 431(7011): 931-45. [doi: org/10.1038/nature03001](https://doi.org/10.1038/nature03001)  
525 PMID: 15496913

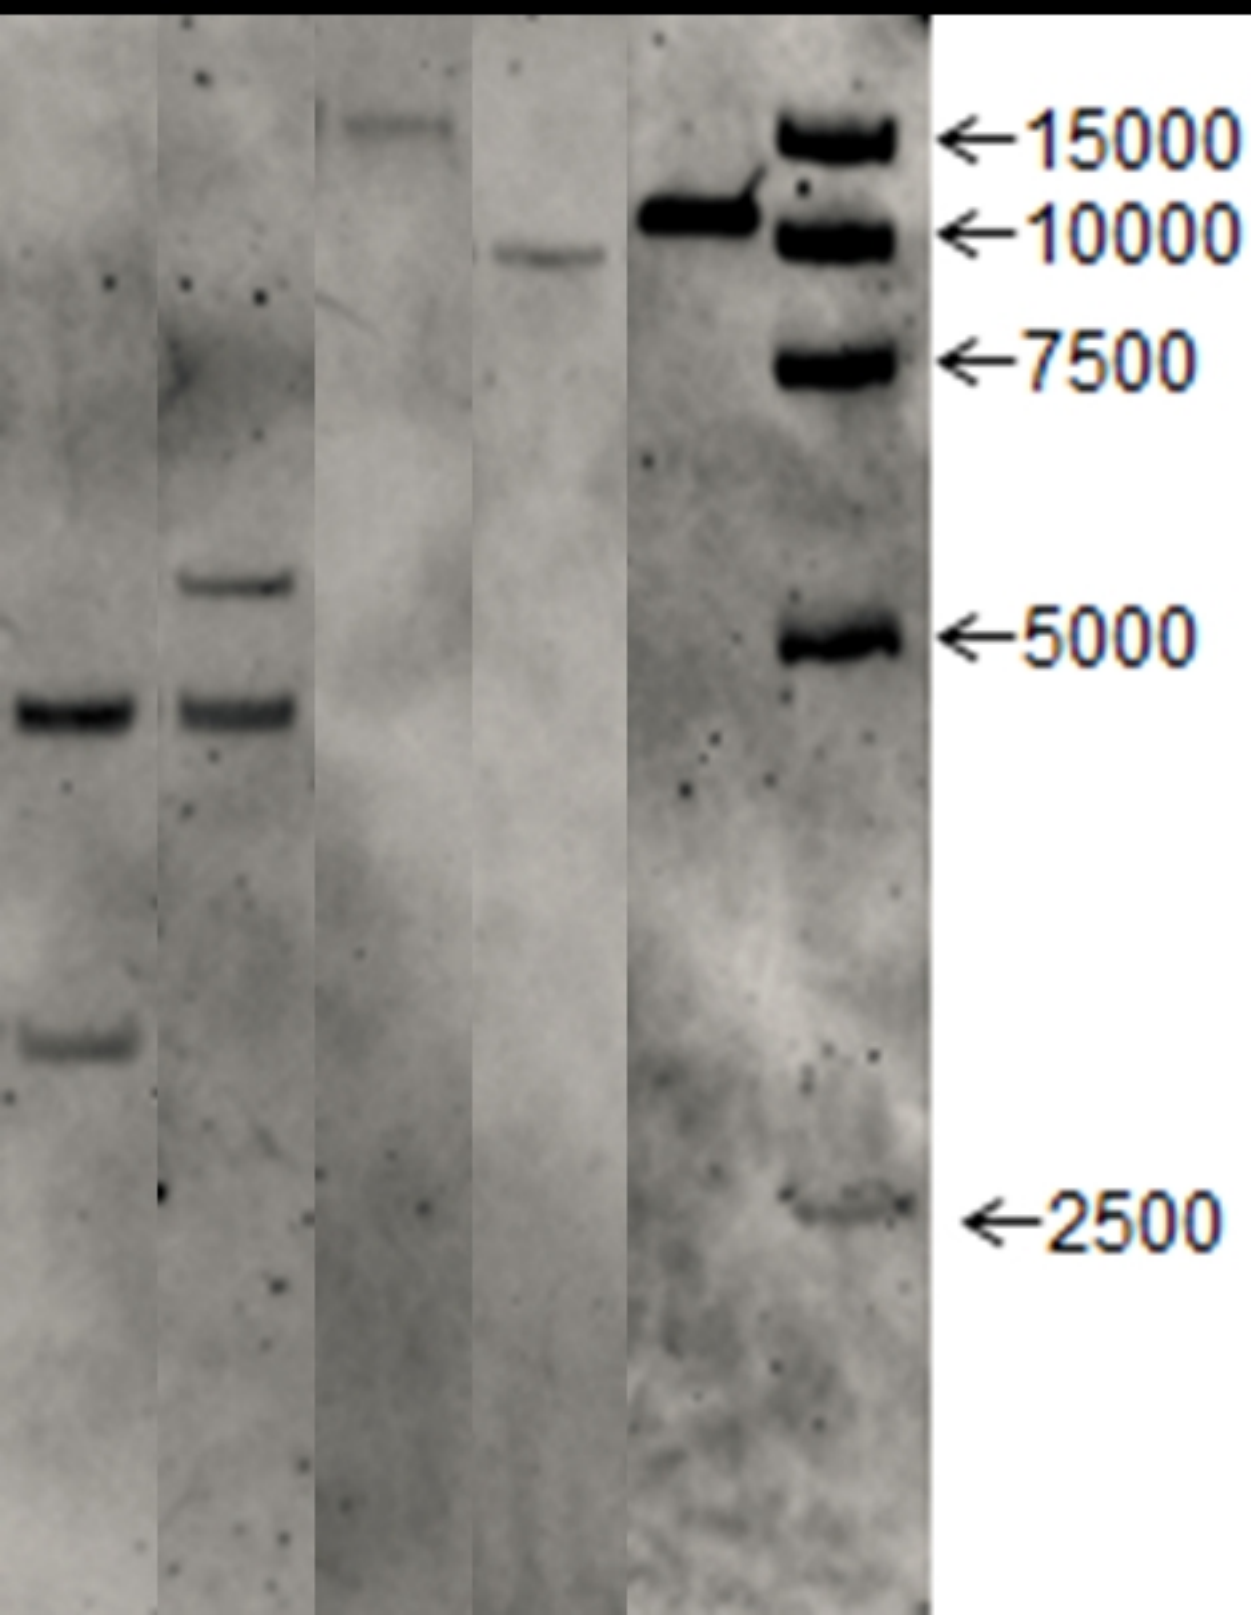

M 1 2 3 4 M 5 6 7 8 M 9 10 11 12

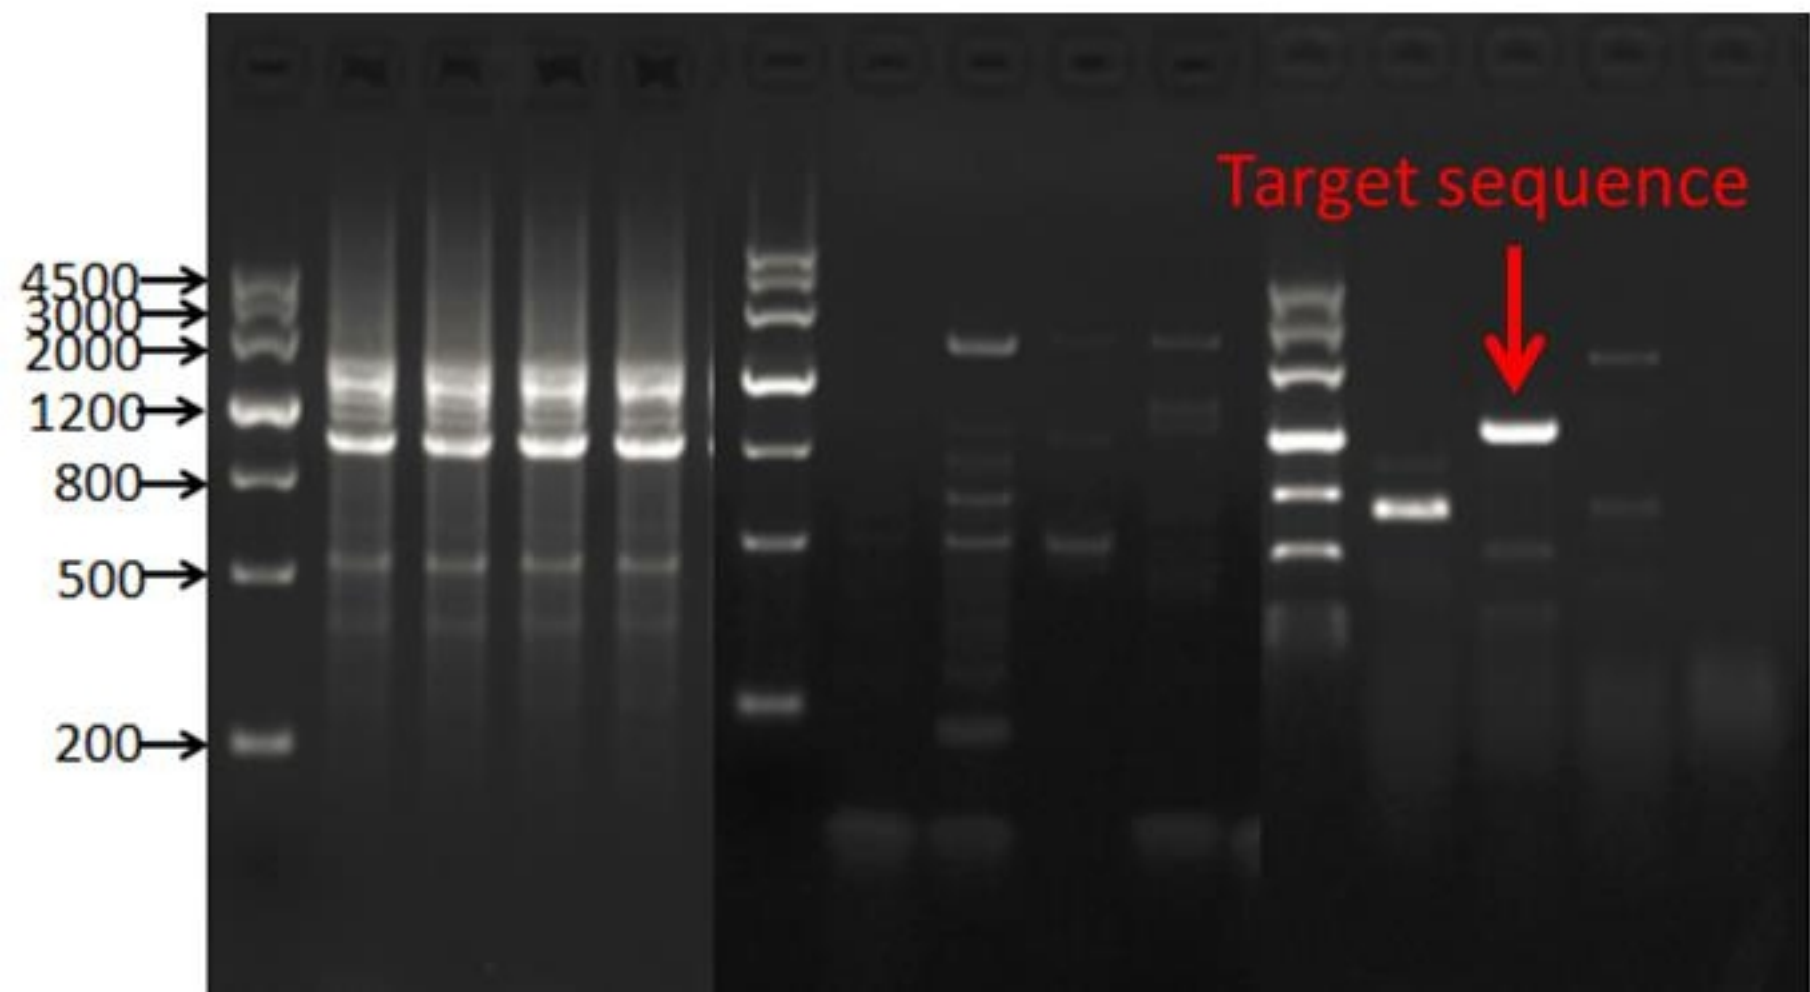

000000

111111

1

1

000000

111111

1

1

1

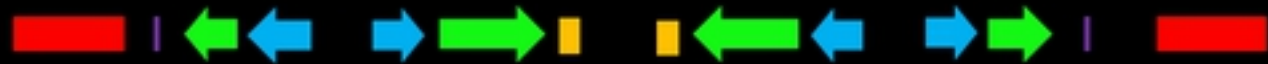

Source: https://www.biorxiv.org/content/10.1101/858951v1.full.pdf
